# Supplementary material
Source: publisher site journal article supplement (https://www.dovepress.com/article/469043)
Supplement: Supplementary file 1 [file get_supplementary_file.php]

| **Table S1**  Results of independent samples t-test. | | | | | |
| --- | --- | --- | --- | --- | --- |
| Classification | | *N* | *M* | *SD* | *t* |
| Genders | Boys | 460 | 0.794 | 0.418 | 4.517*** |
| Girls | 464 | 0.671 | 0.412 |
| **Note:******p* < 0.001. | | | | | |

| **Table S2**  Results of one-way analysis of variance. | | | | | | |
| --- | --- | --- | --- | --- | --- | --- |
| Classification | | *N* | *M* | *SD* | *F* | LSD |
| Children’s grades | Small classes | 399 | 0.709 | 0.399 | 1.842 | — |
| Middle classes | 321 | 0.732 | 0.438 |
| Top classes | 204 | 0.778 | 0.424 |
| Number of children in the family | One | 276 | 0.799 | 0.420 | 5.302** | ①>②③ |
| Two | 595 | 0.700 | 0.060 |
| Three or more | 53 | 0.751 | 0.437 |
| Mother’s educational background | Primary school or below | 78 | 0.774 | 0.490 | 4.717*** | ①②③>④>⑤⑥ |
| Junior high school | 114 | 0.758 | 0.421 |
| High school or secondary school | 179 | 0.829 | 0.402 |
| Junior college | 233 | 0.744 | 0.407 |
| Full-time bachelor's degree | 297 | 0.650 | 0.402 |
| Graduate students (master or doctor) | 23 | 0.661 | 0.445 |
| Maternal age | 21 ~ 30 years old | 101 | 0.931 | 0.383 | 13.471*** | ①>②③ |
| 31 ~ 40 years old | 656 | 0.715 | 0.423 |
| 41 ~ 50 years old | 167 | 0.681 | 0.394 |
| Mother’s working hours | Full-time mothers | 201 | 0.788 | 0.412 | 6.469*** | ①④>②③ |
| 8 hours or less | 275 | 0.679 | 0.399 |
| 8-10 hours | 384 | 0.714 | 0.427 |
| 10 hours or more | 64 | 0.900 | 0.423 |
| Family structure | Divorced or single-parent families | 105 | 0.838 | 0.410 | 3.605* | ①>②③④ |
| Nuclear family | 569 | 0.703 | 0.416 |
| The big family of three generations | 220 | 0.750 | 0.423 |
| Other family forms | 30 | 0.800 | 0.424 |
| **Notes:** **p* < 0.05, ***p* < 0.01, ****p* < 0.001.  **Abbreviation:** LSD, least significant difference. | | | | | | |
